# Supplementary material
Source: Springer Nature journal article supplement (https://www.springermedizin.de/resource/supplementary/12936_2013_2745_MOESM3_ESM.pdf/9544176)
Supplement: MOESM3 [file 9544176]

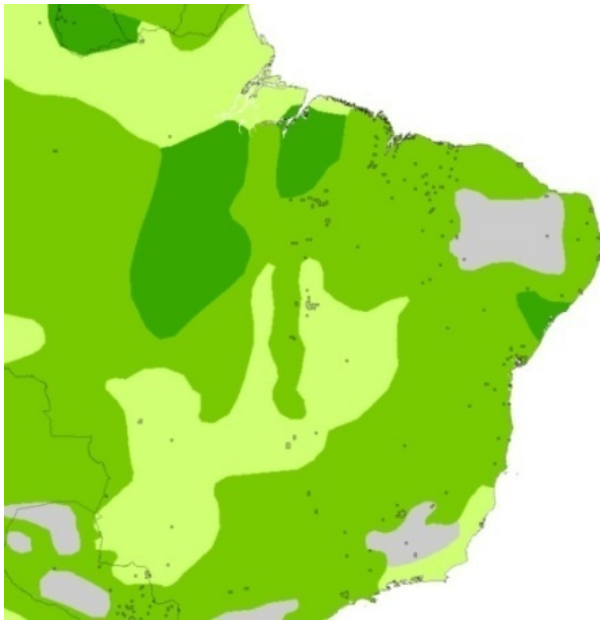

(a)

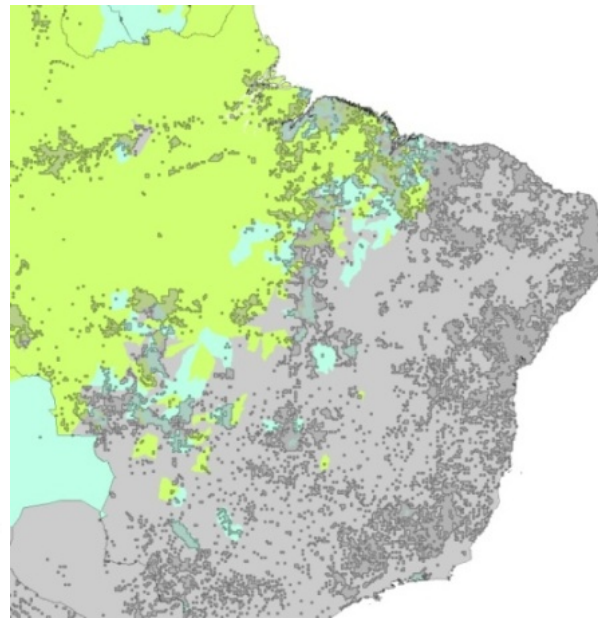

(b)

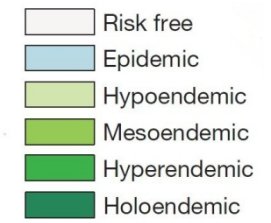

*Malaria endemicity classes and urban areas (outlined in grey) in Brazil for (a) 1900 and (b) 2000*
